# Supplementary material for: Advancing Molecular Insights: A Global Systematic Review and Meta-analysis of Epidemiology and Drug Resistance Patterns of Mycobacterium tuberculosis in Sputum Samples
Source: Research Square preprint supplement (doi:10.21203/rs.3.rs-5798511/v1), 2025-02-14
Supplement: Supplementary file 1 [file 70916b3e49a40719742d4c00.xlsx]

## Sheet: Sheet1
	Molucular epidrmiology and drug resiatance tuberculosis
SN	Reference	Country	Study site	Study duration	Study type	Sample	Sample size	smear +	culture on	isolates	DST	Identification	Ist line drugs						Moleucular analysis
1	Srikar et al., 2023	India	Tripati, Andhara	Sep.2018 to August 2019	cross-sectional study	sputum		104	LJ solid media	104	Protional methods		RIF	INH	STR	ETH	PZA		Spoligo	MIRU-VNTR
2	Flores et al., 2023	Mexico	Monterrey	August 2017 to June 2021.	cross-sectional study	sputum		190	LJ solid media	190	Protional methods		RIF	INH				FQ	Spoligo	MIRU-VNTR
3	Benjamin et al., 2021	Ghana	Eastern region	2017	cross sectional study	sputum	920		LJ solid media	143	Protional methods	BACTEC MGIT 960	RIF	INH	STR	ETH			Spoligo	MIRU-VNTR
4	Diriba et al., 2020	Ethiopia	Addis Ababa	NR	cross sectional study	sputum			LJ solid media	153	Protional methods	BACTEC MGIT 960	RIF	INH	STR	ETH			Spoligo	MIRU-VNTR
5	Worku et al., 2022	Ethiopia	Jigjiga city	October 2018 and Dec. 2019	cross sectional study	sputum		323	LJ solid media	323	Protional methods	BACTEC MGIT 960	RIF	INH	STR	ETH	PZA		Spoligo	MIRU-VNTR
6	Lin et al., 2021	China	Fujian province	August 2016 to August 2017	cross sectional study	sputum			LJ solid media	119	Protional methods	BACTEC MGIT 960	RIF	INH	STR	ETH	PZA		Spoligo	MIRU-VNTR
7	Bai et al., 2019	China	Yunnan province	July 2014 to Dec.r 2016	cross sectional study	sputum			MGIT	270	Protional methods	BACTEC MGIT 960	RIF	INH	STR	ETH	PZA		Spoligo	SIVIT database
8	Ogari et al., 2019	Kenya	Nairobi	September 2015 to August 2016	cross sectional study	sputum		132	MGIT	132	MTBDRplus and genotupe MTBDsl	MTBDRplus and genotupe MTBDsl	RIF	INH	STR	ETH			NA	NA
9	Ameke et al., 2021	Ghana	Volta	January 2016 toJanuary2017	cross sectional study	sputum	183		LJ solid media	115	MTBDRplus		RIF	INH						IS6110
10	Gupta et al., 2019	India	Madhya Pradesh	2014–2017	cross sectional study	sputum	103	103	LJ solid media	103	Protional methods		RIF	INH					Spoligo
11	Yin et al., 2023	China	Southern Xinjiang	September 2017 to Septmber 2019			352		LJ solid media	347	Protional methods	SITVIT2 databas	RIF	INH	STR	ETH			Spoligo	MIRU-VNTR
12	Gautam et al., 2018	Australia	Tasmaniya	2014 to 2016	cross sectional study	sputum			LJ solid media MGIT	18									WGS
13	Devi et al., 2021	India	Sikim	2016-2018	cross sectional study	sputum		399	LJ solid media	399	Protional methods	BACTEC MGIT 960	RIF	INH	STR	ETH	PZA		Spoligo	MIRU-VNTR
14	Luo et al., 2019	China	Jiangxi province	January 2014 to December 2016		sputum	1447		LJ solid media	1071	Protional methods		RIF	INH	STR	ETH				MIRU-VNTR genotypin

## Sheet: Sheet2
Sn	Reference	Country	Study type	Age group	mean age	Gender				Drug resistance												MDR
						Male		Female		RIF		INH		SM		EMB		PZA		FQ				Daibetes		HIV
						No.	%	No	%	No	%	No	%	No	%	No	%	N0	%	No	%	No.	%	no	%	no	%
1	Srikar et al., 2023	India	Cross sectional	10 to 90	50	41	39.42	63	60.57	4	3.85	16	15.38	5	4.81	6	5.77	NA				24	23
2	Flores-aréchiga et al. 2023	Mexiko	Cross sectional	0-61	NA	133	70	57	30	5	2.6	13	6.9					NA		3	1.6	3	1.5	55	28.9	26	13.4
3	Benjamin et al., 2021	Ghana	Cross sectional	17-89	46.09	108	75.5	35	24.5	29	36.7	45	57	40	50.6	14	17.7	NA				26	32.9
4	Diriba et al., 2020	Ethiopia	Cross sectional	NA	32.2	82	54.3	69	54.7	11	8	19	13.8	7	5.1	3	2.2	19	13.9			29	19.2	14	9.3	34	22.5
5	Worku et al., 2022	Ethiopia	Cross sectional	15-80	28	208	64.4	192	59.4	NA	NA	NA	NA	NA	58		62.2	37				NA
6	Lin et al., 2021	China	Cross sectional	NA	NA	91	76.5	28	23.5	0	0	0	0	39	14.4	56	20.7	50	18.5			NA
7	Bai et al., 2019	China	Cross sectional	NA	41	164	60.7	106	39.3	56	37.8	75	27.8	39	14.4	34	12.6	50	18.5			52	19.3
8	Ogari et al., 2019	Kenya	Cross sectional	18-60	26.4	72	54	60	46	1	0.8	1	0.8	NA		NA		NA				2	1.6			16
9	Ameke et al., 2021	Ghana	Cross sectional	12 to 86	44.8	80	70.1	35	30.4	5	5.1	6		NA		NA		NA				3	3			4	3.5
10	Gupta et al., 2019	India	Cross sectional	17 to 95	NA	81	78.6408	22	21.3592	13	12.6							NA				5	4.8
11	Yin et al., 2023	China	Cross sectional	NA	NA	161	46.3977	186	53.6	61	20.3	98	32.7	67	22.3	26	8.7	NA				23	7.7
12	Gautam et al., 2018	Australia	Cross sectional	0.4 to 70	33.6	13	72.2	5	27.8
13	Devi et al., 2021	India	Cross sectional	NA	NA	NA		NA		NA		NA		NA		NA		NA				81	34.4
14	Luo et al., 2019	China	Cross sectional	NA	NA					28		60		60		2		NA				157
	Reference	male	famale	Total	RIF	INH	SM	PZA	EMB	MDR		Total	DRTB
	Srikar et al., 2023	41	63	104	4	16	5	0	6	24		8	4
	Flores-aréchiga et al. 2023	133	57	190	5	13		NA		3		10	5
	Benjamin et al., 2021	108	35	143	1	6	4	NA	1	26		2	1
	Diriba et al., 2020	82	69	151	11	19	7	19	3	29		22	11
	Worku et al., 2022	208	192	400	NA	NA	NA	37	NA	NA		37	NA
	Lin et al., 2021	91	28	119	0	0	0	50	56	NA		0	0
	Bai et al., 2019	164	106	270	13	23	26	25	68	52		26	13
	Ogari et al., 2019	72	60	132	1	1	NA	NA	NA	2		2	1
	Ameke et al., 2021	80	35	115	5	6	NA	NA	NA	3		10	5
	Gupta et al., 2019	81	22	103	7			NA		5		14	7
	Yin et al., 2023	161	186	347	3	31	13	NA	26	23		6	3

## Sheet: Sheet3
SN	Reference	Country	Lineage																																		Ural		CAS		CAS 2		MANU2		EAI7		URAL2		1
			EAI3- Ind		EAI5		Beijing		CAS1-Delhi		T-H37rv	%	Orphan		X	%	Ghana		EAI	%	S	%	Haarlem		Uganda		LAM		Cam		W.Afrlca 1		W.Afrlca 2		T
1	Srikar et al., 2023	India	20	19.23	13	12.5	12	11.54	9	8.65	6	7.63	6	7.63
2	Flores-aréchiga et al. 2023	Mexico					11	5.8					85	45.1	46	24.2	16	8.4	9	4.7	7	3.7	6	3.2	5	2.6	4	2.1
3	Benjamin et al., 2021	Ghana					1	0.9					8	7.8	1	0.7	23	22.5	1	0.9			5	4.9	5	4.9	1	0.9	45	44.1	7	6.9	3	2.9
4	Diriba et al., 2020	Ethiopia					1	0.7	29	19.2	3	2	9	6									15	9.9			6	4					3		81	53.6	6	4
5	Devi et al., 2021	India	1		2	0.5	249	62.41	63	15.79			3	0.75	2	0.5							7	1.75			5	1.25							23	5.79
6	Worku et al., 2022	Ethiopia					3	1.2					2	0.8	3	1.2			16	6.4	1	0.4	23	9.2			15	6							8	2			7	1.75	4	1	3	0.75	2	0.5	1	0.25	14
7	Lin et al., 2021	China					80	67.2															4	3.4											105	42.2			73	29.3		2	0.8
8	Bai et al., 2019	China					199	73.7					38	14.07																					20	7.4	2	3.7	0.74				10	3.7
9
10
11	Ameke et al., 2021	Ghana					3	2.6	1	0.9					1	0.9								9	7.8		2	1.7	64	55.6		17	14.8	7	6.1
12	Gupta et al., 2019	India	44		5				38																										5		2		7		1
13	Yin et al., 2023	China					207	59.7	46	13.3			26	7.5					11	3.2							2	0.6							18	5.2			1	0.7							30	8.6
14	Gautam et al., 2018	Australia																																															4
	Author	Country	L1	L2	L3	L4	L5	L6	L7	Other			L1	L2	L3	L4	L5	L6	L7	Other
	Srikar et al., 2023	India	0	12	0	0	Ghana			6	2023		33	12	12	73	16			6
	Flores-aréchiga et al. 2023	Mexico	EAI	11		77				85	2923		9	11						85
1	Benjamin et al., 2021	Ghana	0	12		80	0	0		8	2021		1	1		57	30	1		8
2	Diriba et al., 2020	Ethiopia		1	29	13	3			9	2020
3	Devi et al., 2021	India	0	1	29	36				3	2021
4	Worku et al., 2022	Ethiopia	16	58	88	118				2	2022
5	Lin et al., 2021	China	0	80	75	110					2021
6	Bai et al., 2019	China	10	199		22				38	2019
7	Ameke et al., 2021	Ghana		3	1	77	24				2021
8	Gupta et al., 2019	India	49		46	14	24				2019
11	Yin et al., 2023	China	11	207	47	50				26	2023
	Yin et al., 2023	China	11	207	47	50				26	2023
13	Gautam et al., 2018	Australia	4	2	11	2					2018
14	Gautam et al., 2018	Australia	4	2	11	2					2018
[truncated: 9 more columns]

## Sheet: Sheet4
MDR Association		ioslates	male	female	EAI3- Ind		EAI5		Beijing	P	CAS1-Delhi		T-H37rv	%	Orphan		X		Ghana		EAI		S		Haarlem		Uganda		LAM		Cam		W.Afrlca 1		W.Afrlca 2		<25		25-34		35-44		45-54		55-64		>64
1	Benjamin et al., 2021	79	20	6					1	1					26	8			11	5	1	0			1	1	3	0	1	0	25	8	6	1	4	2	9	4	13	5	13	3	21	7	13	3	10	4
2	Lin et al., 2021	119	91	28					80																												9	7.6			45	37.8	65	54.6
3	Bai et al., 2019	270							41
4	Luo et al., 2019	1071	103	54
	Reference	Isolates	M	F	1	2	3	4	5	6	7		O		<25		25-34		35-44		45-54		55-64		>64	0
	Benjamin et al., 2021	79	20	6	1	1		30	21				26		9	4	13	5	13	3	21	7	13	3	10
	Lin et al., 2021	119	91	28		80									9	7.6			45	37.8	65	54.6
	Bai et al., 2019	270				41
	Luo et al., 2019	1071	103	54

## Sheet: Sheet5
				Drug resistance
				RIF			INH		SM		EMB		PZA		MDR		Daibetes		HIV		%
SN	Reference	Country	Isolates	No	%	%	No	%	No	%	No	%		%	No.	%	no	%	no	%	28.85
1	Srikar et al., 2023	India	104	30	28.85	28.85	49	47.1154	36	34.62	6	5.77	0		24	23					2.6
2	Flores et al., 2023	Mexico	190	5	2.6	2.6	13	6.9							3	1.5	55	28.9	26	13.4	36.7
3	Benjamin et al., 2021	Ghana	143	29	36.7	36.7	45	57	40	50.6	14	17.7			26	32.9					8
4	Diriba et al., 2020	Ethiopia	153	11	8	8	19	13.8	7	5.1	3	2.2	19	13.9	29	19.2	14	9.3	34	22.5
5	Worku et al., 2022	Ethiopia	323							58		62.2	37								20.7
6	Lin et al., 2021	China	119	56	20.7	20.7	34	27.8	39	14.4	56	20.7	50	18.5							37.8
7	Bai et al., 2019	China	270	56	37.8	37.8	74.25	27.8	39	14.4	34	12.6	50	18.5	52	19.3					0.8
8	Ogari et al., 2019	Kenya	132	1	0.8	0.8	1	0.8							2	1.6			16		5.1
9	Ameke et al., 2021	Ghana	115	5	5.1	5.1	6.1								3	3			4	3.5	12.6
10	Gupta et al., 2019	India	103	13	12.6	12.6									5	4.8					20.3
11	Yin et al., 2023	China	347	61	20.3	20.3	98	32.7	67	22.3	26	8.7			23	7.7
13	Devi et al., 2021	India	399	NA											81	34.4
14	Luo et al., 2019	China	1071	28			60		60		2				157
			3469	295	173.45	173.45	399.35	213.915	288	199.42	141	129.87	156	50.9	405	147.4	69	38.2	80	39.4	144.6
